# Supplementary material
Source: PubMed Central journal article supplement (PMC5478975)
Supplement: AEM.00752-17_zam999117925s1.pdf [file AEM.00752-17_zam999117925s1.pdf]

Insights into nitrate-reducing Fe(II) oxidation mechanisms by analyzing  
cell-mineral associations, cell encrustation and mineralogy in the  
chemolithoautotrophic enrichment culture KS

Nordhoff, M.<sup>a</sup>, Tominski, C.<sup>a</sup>, Halama, M.<sup>a</sup>, Byrne, J.M.<sup>a</sup>, Obst, M.<sup>b</sup>, Kleindienst, S.<sup>a</sup>, Behrens, S.<sup>a,c</sup>,  
Kappler, A.<sup>a,d\*</sup>

<sup>a</sup>Geomicrobiology, Center for Applied Geosciences, University of Tuebingen, Tuebingen,  
Germany, <sup>b</sup>Bayreuth Center for Ecology and Environmental Research, University of Bayreuth,  
Germany, <sup>c</sup>Department of Civil, Environmental, and Geo-Engineering, University of Minnesota,  
Minneapolis, USA, <sup>d</sup>Center for Geomicrobiology, Department of Bioscience, Aarhus University,  
Denmark

\*To whom correspondence should be sent:

Andreas Kappler, Geomicrobiology, Center for Applied Geosciences

University of Tuebingen, Sigwartstrasse 10, D-72076 Tuebingen, Germany

Phone: +49-7071-2974992, Fax: +49-7071-29-295059

Email: [andreas.kappler@uni-tuebingen.de](mailto:andreas.kappler@uni-tuebingen.de)

**SUPPLEMENTARY INFORMATION**

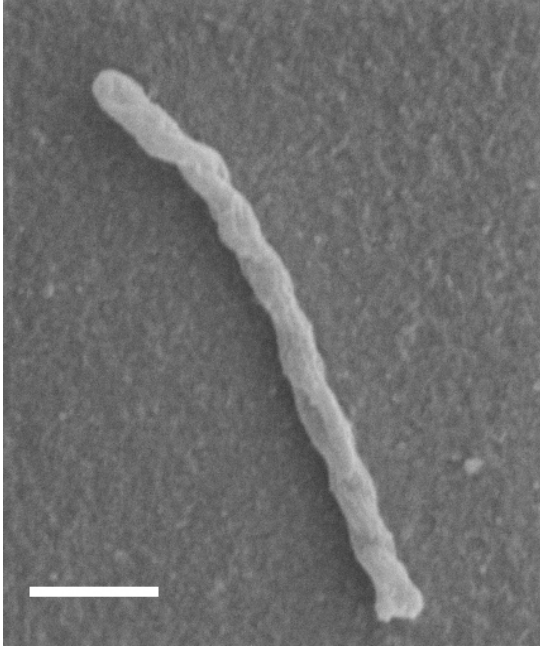

**Figure S1:** SEM image of a cell with rough surface from culture KS grown under heterotrophic conditions (5 mM acetate and 4 mM nitrate). Scale bar is 1  $\mu\text{m}$ .

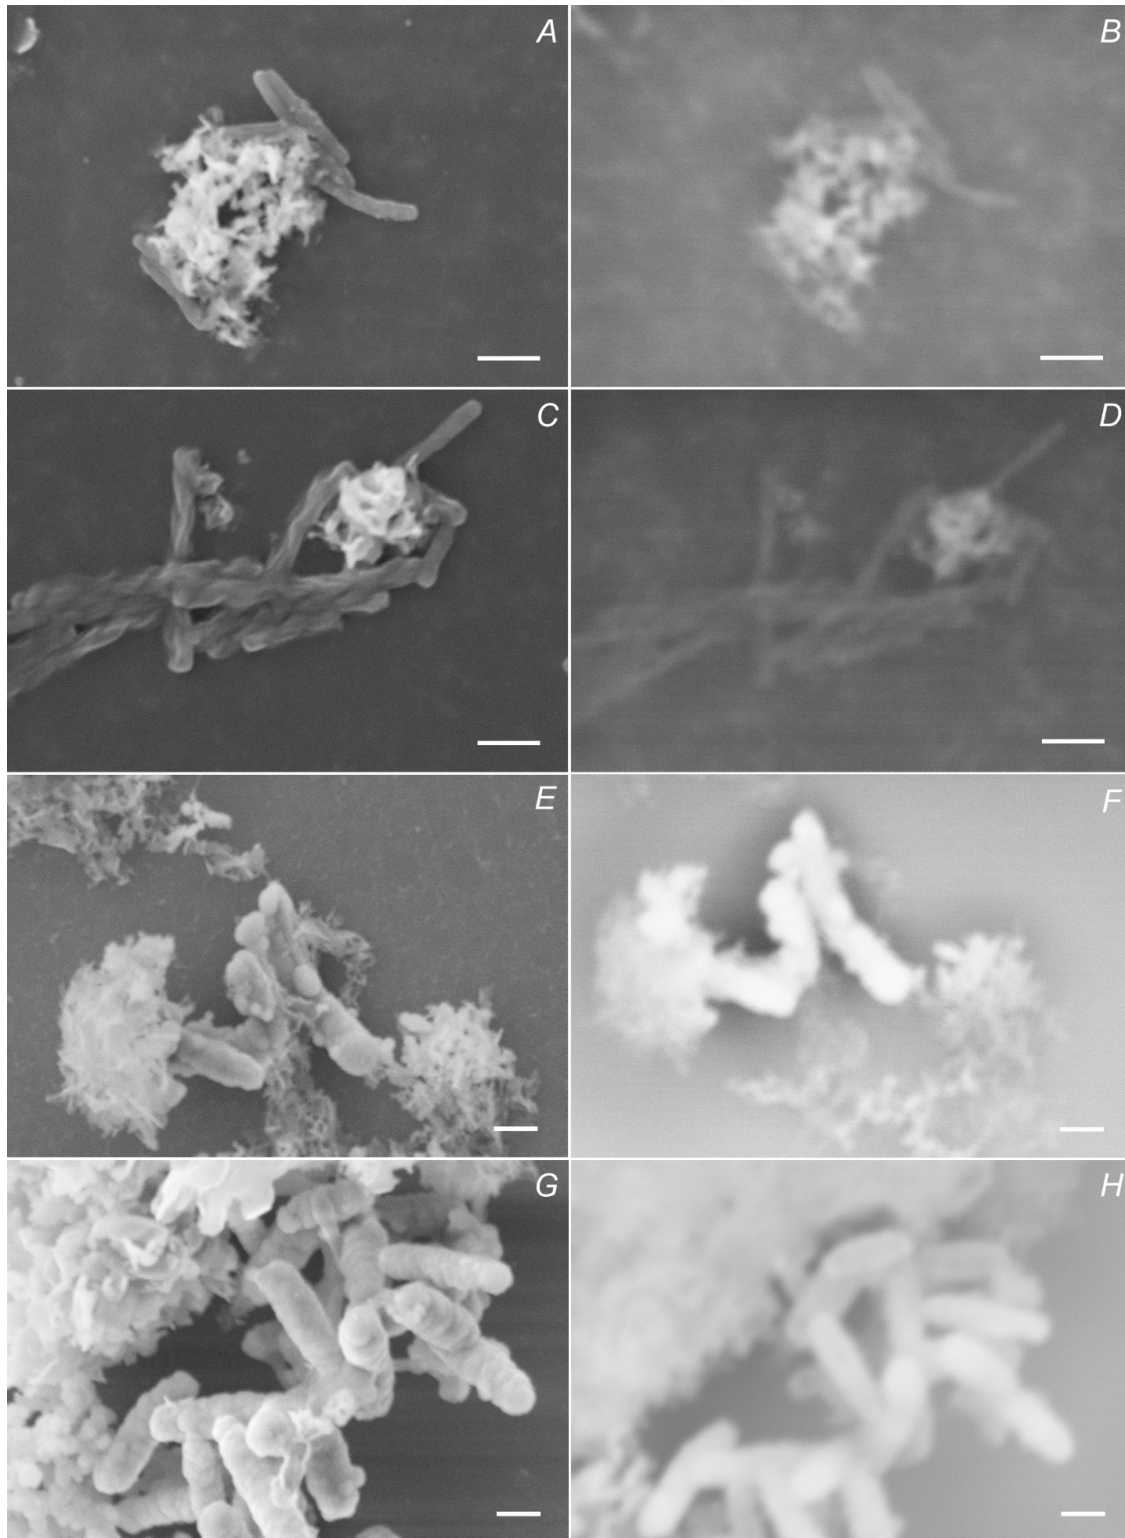

**Figure S2:** SE (6 kV) (left) and BSE (12 kV) (right) images of culture KS grown under autotrophic (10 mM Fe(II) and 4 mM nitrate) (A, B) and mixotrophic (10 mM Fe(II), 5 mM acetate and 4 mM nitrate) (C, D) conditions, and of *Nocardiooides* sp. (E, F) and *Rhodanobacter* sp. (G, H) isolated from culture KS grown under mixotrophic conditions (10 mM Fe(II), 5 mM acetate and 4 mM nitrate). Scale bars are 1 μm.

**Table S1:** Moessbauer spectroscopy fitting parameters obtained for samples shown in figure 5 analyzed at 77 K. CS: center shift relative to  $\alpha$ -Fe, QS: quadrupole splitting,  $\sigma$ : standard deviation, Pop.: relative population,  $\chi^2$ : error of the fit, Db: doublet.

|                          |     | CS (mm/s) | QS (mm/s) | $\sigma$ (mm/s) | Pop. (%) | $\chi^2$ |
|--------------------------|-----|-----------|-----------|-----------------|----------|----------|
| <i>Rhodanobacter</i> sp. | Db1 | 1.27      | 2.25      | 0.33            | 30.7     | 0.54     |
|                          | Db2 | 1.34      | 3.25      | 0.19            | 32.1     |          |
|                          | Db3 | 1.39      | 2.64      | 0.04            | 13.0     |          |
|                          | Db4 | 0.59      | 0.46      | 0.23            | 19.8     |          |
|                          | Db5 | 0.54      | 1.30      | 0.00            | 4.0      |          |
| <i>Nocardioides</i> sp.  | Db1 | 1.31      | 2.35      | 0.46            | 33.0     | 0.58     |
|                          | Db2 | 1.35      | 3.24      | 0.19            | 28.0     |          |
|                          | Db3 | 1.37      | 2.62      | 0.14            | 10.0     |          |
|                          | Db4 | 0.55      | 0.53      | 0.28            | 25.0     |          |
|                          | Db5 | 0.48      | 1.20      | 0.00            | 4.4      |          |
| Culture KS autotrophic   | Db1 | 1.33      | 3.21      | 0.6             | 14.1     | 0.67     |
|                          | Db2 | 1.27      | 2.67      | 0.6             | 9.5      |          |
|                          | Db3 | 0.49      | 0.79      | 0.7             | 76.3     |          |
| Culture KS mixotrophic   | Db1 | 1.32      | 3.22      | 0.8             | 9.1      | 0.67     |
|                          | Db2 | 1.26      | 2.71      | 0.8             | 7.6      |          |
|                          | Db3 | 0.50      | 0.79      | 1.0             | 83.3     |          |
